# Supplementary material
Source: Springer Nature journal article supplement (https://www.springermedizin.de/resource/supplementary/12916_2013_832_MOESM3_ESM.pdf/9598386)

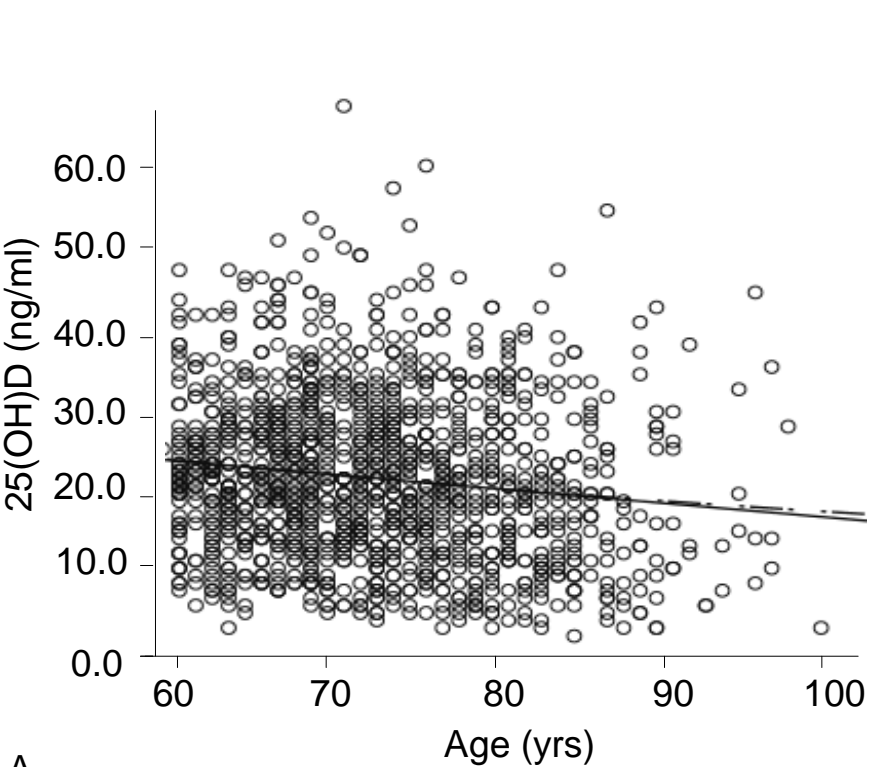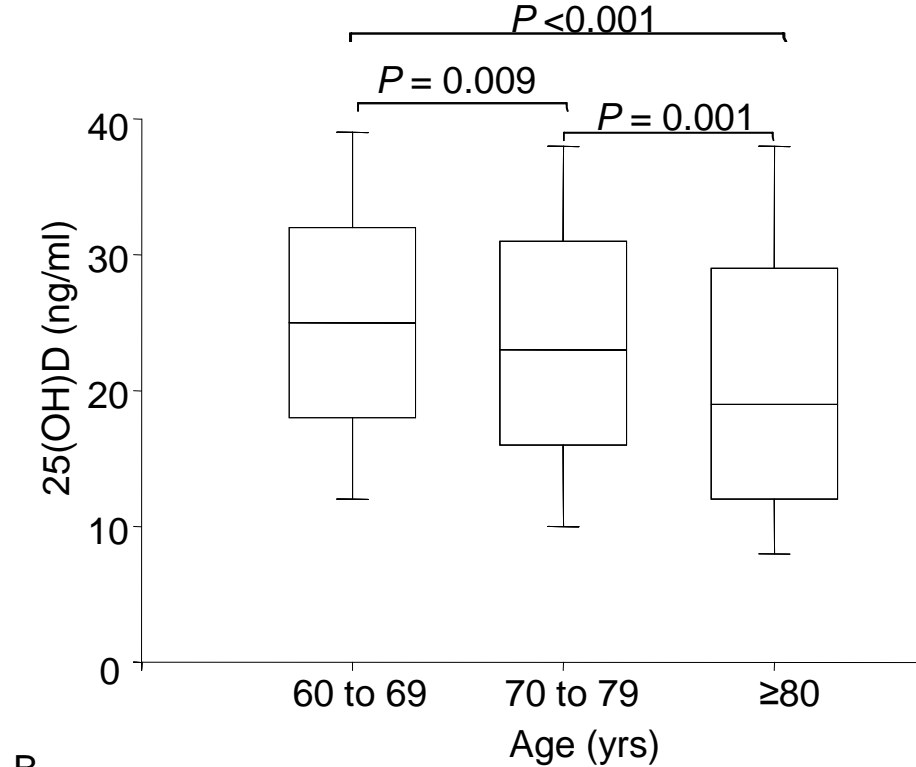

Supplement: MOESM3 [file 9598386]
